# Supplementary material for: Anti-fatigue, self-bonding, adhesive gels for easy-to-prepare 3D stacking flexible electronics
Source: Royal Society of Chemistry journal article supplement (doi:10.1039/d4tc04784b), 2025-01-01
Supplement: d4tc04784b1.pdf [file d4tc04784b1.pdf]

## Supporting Information

### Anti-Fatigue, Self-Bonding, Adhesive Gels for Easy-to-Prepare 3D Stacking Flexible Electronics

*Huiwen Shi<sup>1, 2</sup>, Xin Wang<sup>1</sup>, Huijun Guo<sup>3</sup>, Yanyan Yang<sup>2, \*</sup> and Yongqi Yang<sup>1, \*</sup>*

<sup>1</sup> School of Materials Science and Engineering, Jilin Institute of Chemical Technology,  
Jilin, 132022, China.

<sup>2</sup> School of Chemical and Pharmaceutical Engineering, Jilin Institute of Chemical  
Technology, Jilin, 132022, China.

<sup>3</sup> Center of Characterization and Analysis, Jilin Institute of Chemical Technology, Jilin,  
132022, China.

\* Email: yangyanyan@jlct.edu.cn; yqyang\_bio@jlct.edu.cn

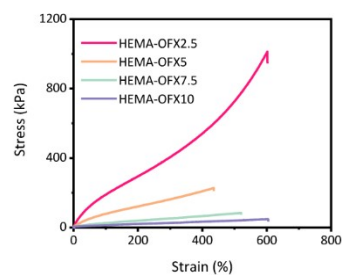

Figure S1. Tensile curves of HEMA-OFX gels.

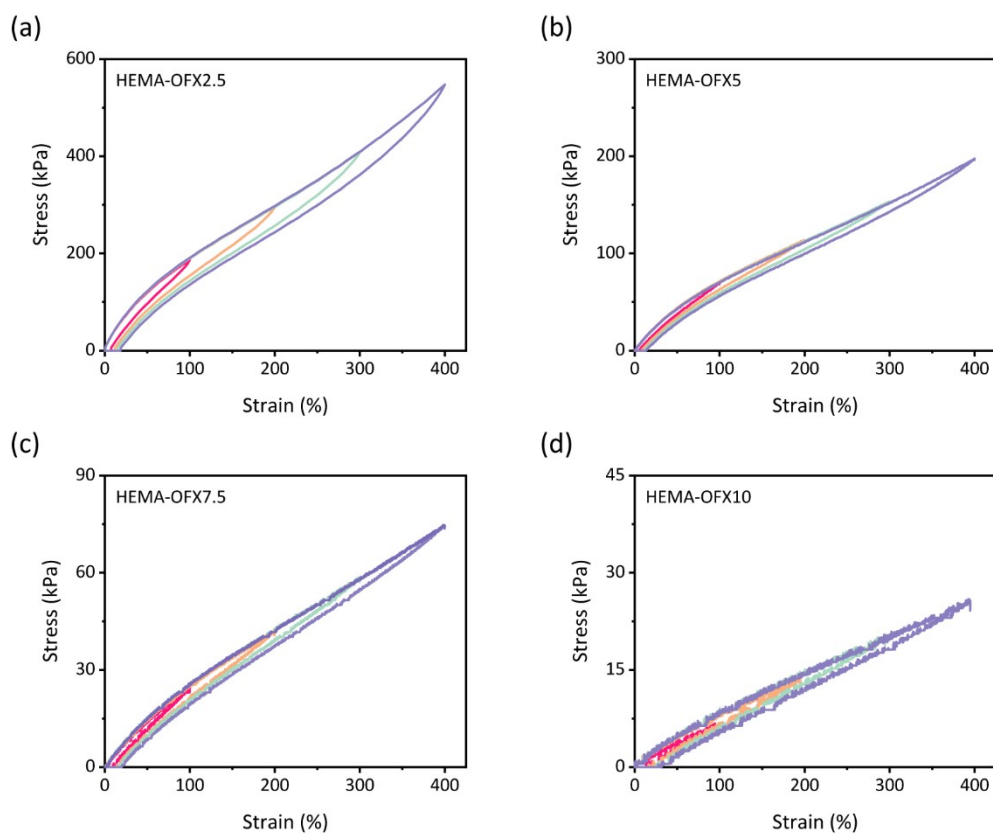

Figure S2. Cyclic stretching curves of HEMA-OFX gels.

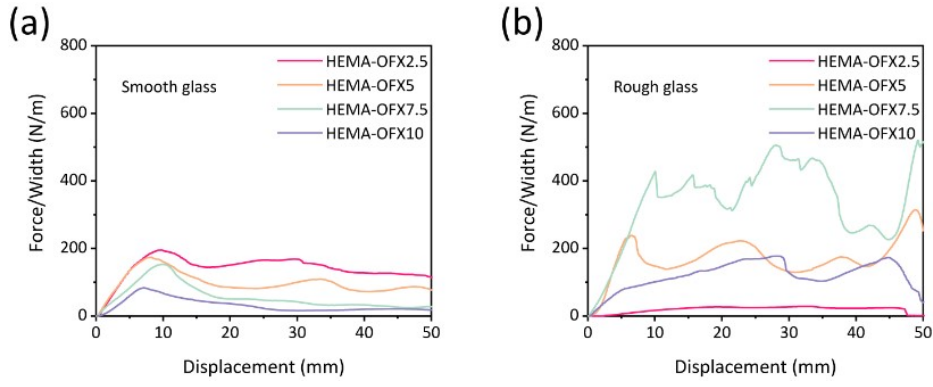

Figure S3. (a) Adhesion strength of HEMA-OFX gels on smooth and (b) rough glass surfaces.

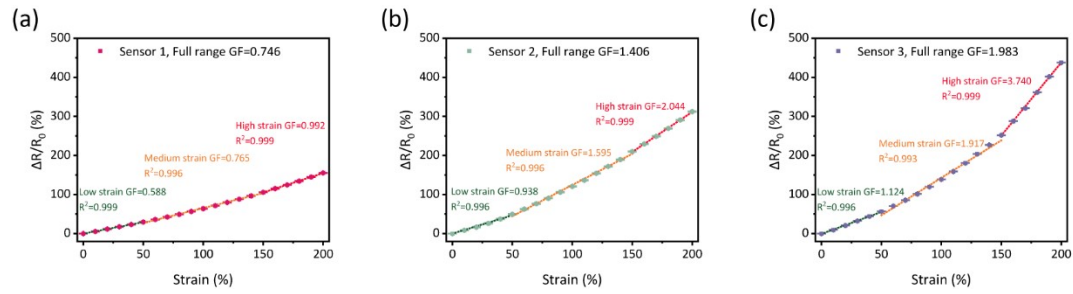

Figure S4. The strain sensing performance of sensors at different strain.

Table S1. Mechanical properties of HEMA-OFX gel.

| Samples            | Stress<br>(kPa) | elongation at<br>break (%) | Young's<br>modulus (kPa) | Toughness<br>(kJ/m <sup>3</sup> ) |
|--------------------|-----------------|----------------------------|--------------------------|-----------------------------------|
| <b>HEMA-OFX2.5</b> | 964.395         | 607.391                    | 256.084                  | 219.069                           |
| <b>HEMA-OFX5</b>   | 221.223         | 450.825                    | 95.500                   | 134.587                           |
| <b>HEMA-OFX7.5</b> | 92.753          | 507.158                    | 29.361                   | 43.583                            |
| <b>HEMA-OFX10</b>  | 37.989          | 543.198                    | 12.479                   | 30.231                            |

Table S2. Self-bonding and adhesive properties of HEMA-OFX gel.

| Samples                 | Self-bonding strength<br>(N/m) |         | Adhesion strength (N/m) |                 |                |
|-------------------------|--------------------------------|---------|-------------------------|-----------------|----------------|
|                         | 1 min                          | 1 h     | Pigskin                 | Smooth<br>glass | Rough<br>glass |
| <b>HEMA-<br/>OFX2.5</b> | 169.563                        | 405.027 | 2.660                   | 148.116         | 23.005         |
| <b>HEMA-<br/>OFX5</b>   | 64.163                         | 257.861 | 12.448                  | 93.775          | 177.828        |
| <b>HEMA-<br/>OFX7.5</b> | 40.235                         | 98.009  | 40.295                  | 49.964          | 368.430        |
| <b>HEMA-<br/>OFX10</b>  | 3.182                          | 41.178  | 18.395                  | 27.035          | 141.542        |
